# Supplementary material for: Long-term results and GvHD after prophylactic and preemptive donor lymphocyte infusion after allogeneic stem cell transplantation for acute leukemia
Source: PubMed Central journal article supplement (PMC8821014; doi:10.1038/s41409-021-01515-3), 2021-11-08
Supplement: 41409_2021_1515_MOESM1_ESM.pdf [file 41409_2021_1515_MOESM1_ESM.pdf]

**Supplementary table 1: Response to preemptive DLI by diagnose**

**AML**

|                   | Reason for DLI        |            | Total |
|-------------------|-----------------------|------------|-------|
|                   | MRD/molecular relapse | MC         |       |
| Response, n (%)   | 13 (81.3%)            | 92 (71.9%) | 105   |
| No response n (%) | 3 (18.7%)             | 36 (28.1%) | 39    |
| missing           | 0                     | 9          | 9     |
| Total, n          | 16                    | 137        | 153   |

**ALL**

|                   | Reason for DLI        |          | Total |
|-------------------|-----------------------|----------|-------|
|                   | MRD/molecular relapse | MC       |       |
| Response, n (%)   | 3 (60%)               | 18 (60%) | 21    |
| No tesponse n (%) | 2 (40%)               | 12 (40%) | 14    |
| missing           | 2                     | 2        | 4     |
| Total, n          | 7                     | 32       | 39    |

Note: DLI, donor lymphocyte infusic

Reason for DLI

Total
