# Supplementary material for: Long-term results and GvHD after prophylactic and preemptive donor lymphocyte infusion after allogeneic stem cell transplantation for acute leukemia
Source: PubMed Central journal article supplement (PMC8821014; doi:10.1038/s41409-021-01515-3), 2021-11-08
Supplement: 41409_2021_1515_MOESM2_ESM.pdf [file 41409_2021_1515_MOESM2_ESM.pdf]

**Supplementary table 2: Cause of death**

|                             | n (%)      |
|-----------------------------|------------|
| N                           | 119        |
| Original disease            | 62 (55.4%) |
| Secondary malignancy        | 1 (0.9%)   |
| GVHD                        | 19 (17.0%) |
| Infection                   | 18 (16.1%) |
| Interstitial pneumonia      | 4 (3.6%)   |
| Haemorrhage                 | 3 (2.7%)   |
| VOD                         | 2 (1.8%)   |
| Other transp related causes | 3 (2.7%)   |
| Missing                     | 7          |

| MC            | MRD          | proDLI       |
|---------------|--------------|--------------|
| 66            | 11           | 42           |
| 33 ( 54.1% )  | 8 ( 72.73% ) | 21 ( 52.5% ) |
| 0 ( 0% )      | 0 ( 0% )     | 1 ( 2.5% )   |
| 10 ( 16.39% ) | 1 ( 9.09% )  | 8 ( 20% )    |
| 9 ( 14.75% )  | 1 ( 9.09% )  | 8 ( 20% )    |
| 4 ( 6.56% )   | 0 ( 0% )     | 0 ( 0% )     |
| 1 ( 1.64% )   | 1 ( 9.09% )  | 1 ( 2.5% )   |
| 1 ( 1.64% )   | 0 ( 0% )     | 1 ( 2.5% )   |
| 3 ( 4.92% )   | 0 ( 0% )     | 0 ( 0% )     |
| 5             | 0            | 2            |

Note: GVHD, Graft-versus-Host disease; VOD, veno-occlusive disease
