# Supplementary material for: Long-term results and GvHD after prophylactic and preemptive donor lymphocyte infusion after allogeneic stem cell transplantation for acute leukemia
Source: PubMed Central journal article supplement (PMC8821014; doi:10.1038/s41409-021-01515-3), 2021-11-08
Supplement: 41409_2021_1515_MOESM3_ESM.pdf [file 41409_2021_1515_MOESM3_ESM.pdf]

### Supplementary table 3: Risk factor analysis for 5 year outcome after prophylactic DLI (n=126)

#### Univariate analysis

|                            |                  | Relapse          | NRM             | LFS              | OS               |
|----------------------------|------------------|------------------|-----------------|------------------|------------------|
| Patient age                | age<median (46y) | 32%[20.8-43.7]   | 6.6%[2.1-14.8]  | 61.5%[48.2-72.3] | 69.5%[56.3-79.3] |
|                            | age>median       | 24%[14.2-35.2]   | 13.6%[6.2-23.7] | 62.4%[48.9-73.3] | 66.6%[53-77.1]   |
|                            | P value          | 0.21             | 0.2             | 0.68             | 0.93             |
| classes                    | (18,35]          | 40%[22.4-57]     | 6.7%[1.1-19.5]  | 53.3%[34.3-69.1] | 63.3%[43.6-77.8] |
|                            | (35,45]          | 24.1%[10.4-40.9] | 7.5%[1.2-21.7]  | 68.4%[47.9-82.2] | 75.1%[54.6-87.4] |
|                            | (45,60]          | 27.6%[15.7-41]   | 14.2%[5.5-26.7] | 58.2%[42.2-71.2] | 63.5%[47-76.1]   |
|                            | (60+)            | 15.8%[3.7-35.6]  | 10.5%[1.7-29]   | 73.7%[47.9-88.1] | 73.7%[47.9-88.1] |
|                            | P value          | 0.34             | 0.75            | 0.52             | 0.4              |
|                            | (18,60]          | 30.2%[21.7-39.2] | 9.9%[5-16.8]    | 59.8%[49.7-68.6] | 67.1%[57-75.3]   |
|                            | (60+)            | 15.8%[3.7-35.6]  | 10.5%[1.7-29]   | 73.7%[47.9-88.1] | 73.7%[47.9-88.1] |
|                            | P value          | 0.18             | 0.87            | 0.29             | 0.56             |
| Time HCT DLI               | <median (169d)   | 26.1%[15.8-37.6] | 10.2%[4.1-19.6] | 63.7%[50.2-74.5] | 68.6%[55.2-78.8] |
|                            | >median          | 30%[19.1-41.5]   | 9.9%[4-19.1]    | 60.1%[46.9-71.1] | 67.7%[54.5-77.9] |
|                            | P value          | 0.8              | 0.93            | 0.88             | 0.99             |
| Year                       | <2005            | 22.7%[11.6-36.1] | 15.9%[6.9-28.3] | 61.4%[45.4-73.9] | 63.6%[47.7-75.9] |
|                            | >=2005           | 31.1%[21.3-41.5] | 6.4%[2.3-13.5]  | 62.4%[50.8-72.1] | 71.2%[59.8-79.9] |
|                            | P value          | 0.41             | 0.1             | 0.85             | 0.79             |
| Female to male combination | noFtoM           | 30.8%[22.1-39.8] | 10%[5.1-16.9]   | 59.2%[49-68]     | 65.7%[55.5-74.1] |
|                            | FtoM             | 15.8%[3.7-35.6]  | 10.5%[1.6-29.1] | 73.7%[47.9-88.1] | 78.9%[53.2-91.5] |
|                            | P value          | 0.19             | 0.89            | 0.28             | 0.26             |
| diagnosis                  | AML              | 25.4%[17.1-34.6] | 9%[4.2-16.2]    | 65.6%[54.8-74.3] | 72.9%[62.5-80.9] |
|                            | ALL              | 36.7%[19.8-53.8] | 13.3%[4.1-28.2] | 50%[31.3-66.1]   | 53.1%[34-69]     |
|                            | P value          | 0.23             | 0.45            | 0.08             | <b>0.049</b>     |
| CR1                        | CR1              | 26.8%[17.7-36.8] | 10.2%[4.7-18.3] | 63%[51.4-72.5]   | 70%[58.6-78.9]   |
|                            | not CR1          | 31.9%[18.2-46.5] | 10.1%[3.1-21.9] | 58%[41.4-71.5]   | 62.6%[45.7-75.6] |
|                            | P value          | 0.55             | 0.99            | 0.58             | 0.53             |
| Intensity of conditioning  | MAC              | 28.2%[18.7-38.5] | 10.5%[4.9-18.7] | 61.3%[49.4-71.1] | 64.8%[52.9-74.3] |

|                        |               |                  |                 |                  |                  |
|------------------------|---------------|------------------|-----------------|------------------|------------------|
|                        | RIC           | 28%[15.9-41.5]   | 8.9%[2.7-19.6]  | 63.1%[47.4-75.3] | 74.2%[58.9-84.5] |
|                        | P value       | 0.75             | 0.8             | 0.66             | 0.78             |
| TBI                    | CT            | 20.1%[9.8-33]    | 11.8%[4.2-23.8] | 68%[51.9-79.7]   | 70.3%[54.2-81.6] |
|                        | TBI           | 32.2%[22.3-42.6] | 8.9%[3.9-16.5]  | 58.8%[47.2-68.7] | 67.2%[55.6-76.4] |
|                        | P value       | 0.14             | 0.59            | 0.3              | 0.6              |
| Cell source            | BM            | 24%[9.5-42.1]    | 12%[2.9-28.1]   | 64%[42.2-79.4]   | 64%[42.2-79.4]   |
|                        | PB            | 29.1%[20.5-38.3] | 9.4%[4.6-16.3]  | 61.5%[51-70.3]   | 69.3%[59-77.5]   |
|                        | P value       | 0.54             | 0.71            | 0.69             | 0.9              |
| Type of donor          | MSD           | 31.2%[21-42]     | 6.9%[2.5-14.4]  | 61.8%[49.7-71.9] | 71.1%[59.2-80.2] |
|                        | UD            | 23.1%[12.7-35.3] | 15%[6.4-27.1]   | 61.9%[46.7-74]   | 63.6%[48.3-75.5] |
|                        | P value       | 0.28             | 0.16            | 0.88             | 0.54             |
|                        | noFtoM        | 30.8%[22.1-39.8] | 10%[5.1-16.9]   | 59.2%[49-68]     | 65.7%[55.5-74.1] |
|                        | FtoM          | 15.8%[3.7-35.6]  | 10.5%[1.6-29.1] | 73.7%[47.9-88.1] | 78.9%[53.2-91.5] |
|                        | P value       | 0.19             | 0.89            | 0.28             | 0.26             |
| in vivo TCD            | no invivo TCD | 22.9%[12.2-35.7] | 12.6%[5-23.7]   | 64.5%[49.3-76.2] | 68.7%[53.5-79.8] |
|                        | invivo TCD    | 30.6%[20.5-41.3] | 8.6%[3.4-16.7]  | 60.8%[48.6-71]   | 68.5%[56.3-78]   |
|                        | P value       | 0.58             | 0.46            | 0.99             | 0.66             |
| Ex vivo TCD            | no exvivo TCD | 29.7%[19.7-40.4] | 10%[4.3-18.6]   | 60.3%[47.9-70.6] | 68.6%[56.5-78]   |
|                        | ex vivo TCD   | 26.5%[15.1-39.5] | 10.3%[3.7-20.8] | 63.2%[48.1-75]   | 67.3%[52.3-78.5] |
|                        | P value       | 0.98             | 0.95            | 0.93             | 0.75             |
| Accute GvHD before DLI | no            | 27.3%[19.3-35.9] | 9.4%[4.7-15.9]  | 63.4%[53.6-71.7] | 68.6%[58.9-76.5] |
|                        | yes           | 28.6%[8.2-53.4]  | 15.2%[2.1-39.9] | 56.2%[27.2-77.6] | 69.8%[37.8-87.6] |
|                        | P value       | 0.98             | 0.54            | 0.74             | 0.81             |

### Multivariate analysis

No factor significant; only a trend for a lower OS in ALL compared to AML (HR: 1.88, 95% CI: 0.99-3.58)

Note: DLI, donor lymphocyte infusion; IQR, interquartile range; AML, Acute myeloid leukemia; ALL, acute lymphoblastic leukemia; alloSCT: allogeneic stem cell transplantation, TBI, total body irradiation; CR: complete remission; MRD, minimal residual disease; TCD, T cell depletion; GvHD, Graft-versus-Host Disease
