# Supplementary material for: Long-term results and GvHD after prophylactic and preemptive donor lymphocyte infusion after allogeneic stem cell transplantation for acute leukemia
Source: PubMed Central journal article supplement (PMC8821014; doi:10.1038/s41409-021-01515-3), 2021-11-08
Supplement: 41409_2021_1515_MOESM4_ESM.pdf [file 41409_2021_1515_MOESM4_ESM.pdf]

**Supplementary table 4: Risk factor analysis for 5 year outcome after preemptive DLI for mixed chimerism (n=169)**

**Univariate analysis**

|                            |                  | <b>LFS</b>       | <b>OS</b>        |
|----------------------------|------------------|------------------|------------------|
| Patient age                | age<=50 (median) | 55.2%[43.7-65.2] | 62.3%[50.8-71.8] |
|                            | age>50           | 59%[47.5-68.9]   | 64.4%[52.8-73.9] |
|                            | P value          | 0.8              | 0.93             |
| classes                    | (18,35]          | 51.7%[32.5-67.9] | 51.7%[32.5-67.9] |
|                            | (35,45]          | 54.1%[36.4-68.9] | 58.4%[39.7-73.1] |
|                            | (45,60]          | 67.5%[55.4-76.9] | 76.9%[65.4-85]   |
|                            | (60+]            | 39.2%[20.9-57.1] | 45.4%[25.9-62.9] |
|                            | P value          | 0.046            | 0.02             |
|                            | (18,60]          | 60.7%[52-68.4]   | 67.1%[58.4-74.3] |
|                            | (60+]            | 39.2%[20.9-57.1] | 45.4%[25.9-62.9] |
|                            | P value          | <b>0.02</b>      | <b>0.017</b>     |
| Time BMT DLI               | <190d (median)   | 46%[35-56.3]     | 54.3%[43-64.3]   |
|                            | >190d            | 68%[56.5-77.1]   | 72.4%[61-81]     |
|                            | P value          | <b>0.002</b>     | <b>0.004</b>     |
| Year of HCT                | YEAR<2007        | 56.9%[45.3-67]   | 63.2%[51.5-72.8] |
|                            | YEAR>=2007       | 56.6%[45.1-66.6] | 63.9%[52.5-73.3] |
|                            | P value          | 0.98             | 0.83             |
| Female to male combination | noFtoM           | 55.4%[46.6-63.4] | 62.7%[53.9-70.3] |
|                            | FtoM             | 65.1%[44.8-79.5] | 66.9%[45.5-81.4] |
|                            | P value          | 0.44             | 0.53             |
| Diagnosis                  | AML              | 57.4%[48.5-65.4] | 64.7%[55.8-72.2] |
|                            | ALL              | 56.1%[37.4-71.2] | 58.2%[38.8-73.3] |

|                            |               |                  |                  |
|----------------------------|---------------|------------------|------------------|
|                            | P value       | 0.98             | 0.68             |
| CR1                        | CR1           | 67.4%[58.3-75]   | 71.8%[62.8-79]   |
|                            | not CR1       | 26.7%[13.8-41.6] | 39%[24.1-53.5]   |
|                            | P value       | <b>0.001</b>     | <b>0.001</b>     |
| Intensity of conditioning  | MAC           | 63.4%[51.4-73.3] | 68.8%[56.8-78]   |
|                            | RIC           | 51.2%[40-61.3]   | 58.3%[46.9-68]   |
|                            | P value       | 0.13             | 0.2              |
| TBI                        | CT            | 51.2%[40.8-60.6] | 59.7%[49.3-68.7] |
|                            | TBI           | 66%[52.8-76.4]   | 69%[55.8-79]     |
|                            | P value       | 0.19             | 0.39             |
| Cell source                | BM            | 62.2%[36.4-80]   | 62.2%[36.4-80]   |
|                            | PB            | 56.4%[47.9-64.1] | 63.6%[55.1-70.9] |
|                            | P value       | 0.54             | 0.93             |
| Type of donor              | MSD           | 60.2%[50.4-68.7] | 66.3%[56.5-74.3] |
|                            | UD            | 50.8%[36.9-63.2] | 58%[43.8-69.9]   |
|                            | P value       | 0.21             | 0.29             |
| Female to male combination | noFtoM        | 55.4%[46.6-63.4] | 62.7%[53.9-70.3] |
|                            | FtoM          | 65.1%[44.8-79.5] | 66.9%[45.5-81.4] |
|                            | P value       | 0.44             | 0.53             |
| in vivo TCD                | no invivo TCD | 61.5%[46.9-73.2] | 67.1%[52.5-78.1] |
|                            | invivo TCD    | 54.3%[44.4-63.2] | 61.4%[51.5-69.9] |
|                            | P value       | 0.65             | 0.82             |
| ex vivo TCD                | no exvivo TCD | 56%[46.9-64.1]   | 63.1%[54-70.9]   |
|                            | ex vivo TCD   | 60.6%[42-74.9]   | 63.6%[44.9-77.5] |
|                            | P value       | 0.48             | 0.82             |

|                          |         |                  |                  |
|--------------------------|---------|------------------|------------------|
| acute GVHD II before DLI | no      | 56.6%[47.6-64.6] | 63.9%[55-71.5]   |
|                          | yes     | 57.5%[38.1-72.7] | 60.2%[40.5-75.2] |
|                          | P value | 1                | 0.97             |

### Multivariate Analysis

|                                         | LFS                     |                    | OS                      |                    |
|-----------------------------------------|-------------------------|--------------------|-------------------------|--------------------|
|                                         | HR (95% CI)             | p value            | HR (95% CI)             | p value            |
| Age >=60y                               | 1.28 (0.72-2.3)         | 0.4                | 1.33 (0.73-2.44)        | 0.35               |
| <b>AlloSCT Not in CR1</b>               | <b>2.93 (1.77-4.84)</b> | <b>&lt; 0.0001</b> | <b>2.88 (1.7-4.87)</b>  | <b>&lt; 0.0001</b> |
| <b>Time SCT to DLI&gt;median (190d)</b> | <b>0.46 (0.29-0.74)</b> | <b>0.001</b>       | <b>0.47 (0.29-0.78)</b> | <b>0.003</b>       |

Note: DLI, donor lymphocyte infusion; IQR, interquartile range; AML, Acute myeloid leukemia; ALL, acute lymphoblastic leukemia; alloSCT: allogeneic stem cell transplantation, TBI, total body irradiation; CR: complete remission; MRD, minimal residual disease; TCD, T cell depletion; GvHD, Graft-versus-Host Disease
