# Supplementary material for: Long-term results and GvHD after prophylactic and preemptive donor lymphocyte infusion after allogeneic stem cell transplantation for acute leukemia
Source: PubMed Central journal article supplement (PMC8821014; doi:10.1038/s41409-021-01515-3), 2021-11-08
Supplement: 41409_2021_1515_MOESM5_ESM.pdf [file 41409_2021_1515_MOESM5_ESM.pdf]

## Supplementary table 5: Participating centers

| EBMT CIC Center                            | number of patients included |
|--------------------------------------------|-----------------------------|
| 237 Nijmegen [St Radboud]                  | 38                          |
| 203 Leiden [Univ H]                        | 36                          |
| 311 Wiesbaden [KI Diagnostik]              | 28                          |
| 295 Hannover [Medical Univ]                | 24                          |
| 810 Freiburg [University]                  | 22                          |
| 726 Liege [University]                     | 17                          |
| 212 Stockholm [Univ H]                     | 15                          |
| 276 Newcastle-Upon-Tyne [Royal Victoria]   | 15                          |
| 230 Marseille [Paoli Calmettes]            | 14                          |
| 297 Frankfurt_am_Main [Goethe-Universität] | 13                          |
| 513 Munich [KI Grosshadern]                | 11                          |
| 780 Manchester [Christie]                  | 10                          |
| 725 St._Petersburg [Pavlov Med Univ]       | 7                           |
| 248 Pescara [Osp Civile]                   | 6                           |
| 284 Birmingham [Heartlands H]              | 5                           |
| 387 Birmingham [Queen Elizabeth]           | 5                           |
| 587 Reggio_Calabria [Centro Trapianti]     | 5                           |
| 152 Augsburg [Zentra KI]                   | 4                           |
| 676 Vandoeuvre_Les_Nancy [H d`Enfants]     | 4                           |
| 597 Brno [Univ H]                          | 3                           |
| 666 Villejuif [Gustave Roussy]             | 3                           |
| 672 Strasbourg [H Hautepierre]             | 3                           |
| 169 Ankara [Gazi Univ]                     | 2                           |
| 202 Basel [202]                            | 2                           |
| 228 Edinburgh [Western General]            | 2                           |
| 304 Firenze [Careggi-Meyer]                | 2                           |
| 659 Brest [C.H.R.U Brest]                  | 2                           |
| 693 Warsaw [Inst Haematology]              | 2                           |
| 728 Madrid [Puerta de Hierro]              | 2                           |
| 754 Tel-Hashomer [Univ Adults]             | 2                           |
| 926 Montpellier [University]               | 2                           |
| 138 Frankfurt_am_Main [KI Goethe U]        | 1                           |
| 145 Stuttgart [Robert Bosch Kh]            | 1                           |
| 225 Turku [University]                     | 1                           |
| 345 Haifa [Rambam MCH]                     | 1                           |
| 501 Liverpool [Royal Univ H]               | 1                           |
| 530 Greifswald [Ernst-Moritz-Arndt]        | 1                           |
| 614 Hamburg [Univ H]                       | 1                           |
| 677 Katowice [Silesian Med Acad]           | 1                           |
| 718 Pilsen [Charles Univ H]                | 1                           |
| 825 Alessandria [SS Antonio e Biagio]      | 1                           |
| 919 Antalya [Medical Park H]               | 1                           |
| 996 Antwerp_Edegem [UZA]                   | 1                           |
| <b>Total</b>                               | <b>318</b>                  |
